# Supplementary material for: Mutation of the PTCH1 gene predicts recurrence of breast cancer
Source: PubMed Central journal article supplement (PMC6841698; doi:10.1038/s41598-019-52617-4), 2019-11-08

**Research Article:**

**Mutation of the *PTCH1* gene predicts recurrence of breast cancer**

Chih-Yang Wang, PhD<sup>1,2</sup>, Yung-Chieh Chang, MS<sup>1</sup>, Yao-Lung Kuo, MD PhD<sup>3</sup>, Kuo-Ting Lee, MD<sup>3</sup>, Pai-Sheng Chen, PhD<sup>1,4</sup>, Chun Hei Antonio Cheung, PhD<sup>1,2</sup>, Chih-Peng Chang, PhD<sup>1,5</sup>, Nam Nhut Phan, MS<sup>6</sup>, Meng-Ru Shen, MD PhD<sup>2,7</sup>, Hui-Ping Hsu, MD PhD<sup>3\*</sup>

<sup>1</sup>Institute of Basic Medical Sciences, College of Medicine, National Cheng Kung University, Tainan, Taiwan

<sup>2</sup>Department of Pharmacology, College of Medicine, National Cheng Kung University, Tainan, Taiwan

<sup>3</sup>Department of Surgery, National Cheng Kung University Hospital, College of Medicine, National Cheng Kung University, Tainan, Taiwan

<sup>4</sup>Department of Medical Laboratory Science and Biotechnology, College of Medicine, National Cheng Kung University, Tainan, Taiwan

<sup>5</sup>Department of Microbiology and Immunology, College of Medicine, National Cheng Kung University, Tainan, Taiwan

<sup>6</sup>NTT Institute of Hi-Technology, Nguyen Tat Thanh University, Ho Chi Minh City, Vietnam

<sup>7</sup>Department of Obstetrics and Gynecology, National Cheng Kung University Hospital, College of Medicine, National Cheng Kung University, Tainan, Taiwan

\*Corresponding author:

Hui-Ping Hsu, Department of Surgery, National Cheng Kung University Hospital, College of Medicine, National Cheng Kung University, Tainan, Taiwan

Address: No. 138, Sheng-Li Rd. Tainan City, 704, Taiwan

E-mail: [hphsu@mail.ncku.edu.tw](mailto:hphsu@mail.ncku.edu.tw)

Tel.: +886-6-2353535#5272

Fax: +886-6-2766676

**Supplementary Table S1.** Gene lists in OncoPrint Comprehensive Assays version 1 (ThermoFisher®). Total 143 genes were targeted, including 73 genes with hotspot mutations, 49 genes with focal CNV (copy number variants) gains, 26 genes with full CDS (coding DNA sequences) for DEL mutations and CNV loss, and 22 genes with fusion drivers. All these target genes were used in different applications, including 9 genes on 31 Labels, 12 genes in 17 guidelines, 64 genes for drug targets and 64 genes in >800 global clinical trials.

| Hotspot genes, n=73<br>(hotspot coverage) |        |         | Copy Number Variants     |                 |         | Fusion drives,<br>n=22<br>(183 assays) |
|-------------------------------------------|--------|---------|--------------------------|-----------------|---------|----------------------------------------|
|                                           |        |         | CDS, n=26<br>(full gene) | Copy gain, n=49 |         |                                        |
| ABL1                                      | GATA2  | MYD88   | APC                      | ACVRL1          | IGF1R   | ALK                                    |
| AKT1                                      | GNA11  | NFE2L2  | ATM                      | AKT1            | IL6     | RET                                    |
| ALK                                       | GNAQ   | NPM1    | BAP1                     | APEX1           | KIT     | ROS1                                   |
| AR                                        | GNAS   | NRAS    | BRCA1                    | AR              | KRAS    | NTRK1                                  |
| ARAF                                      | HNF1A  | PAX5    | BRCA2                    | ATP11B          | MCL1    | ABL1                                   |
| BRAF                                      | HRAS   | PDGFRA  | CDH1                     | BCL2L1          | MDM2    | AKT3                                   |
| BTK                                       | IDH1   | PIK3CA  | CDKN2A                   | BCL9            | MDM4    | AXL                                    |
| C15orf23                                  | IDH2   | PPP2R1A | FBXW7                    | BIRC2           | MET     | BRAF                                   |
| CBL                                       | IFITM1 | PTPN11  | GATA3                    | BIRC3           | MYC     | CDK4                                   |
| CDK4                                      | IFITM3 | RAC1    | MSH2                     | CCND1           | MYCL    | ERBB2                                  |
| CHEK2                                     | JAK1   | RAF1    | NF1                      | CCNE1           | MYCN    | ERG                                    |
| CSF1R                                     | JAK2   | RET     | NF2                      | CD274           | MYO18A  | ETV1                                   |
| CTNNB1                                    | JAK3   | RHEB    | NOTCH1                   | CD44            | NKX2-1  | ETV4                                   |
| DDR2                                      | KDR    | RHOA    | PIK3R1                   | CDK4            | NKX2-8  | ETV5                                   |
| DNMT3A                                    | KIT    | SF3B1   | PTCH1                    | CDK6            | PCD1LG2 | FGFR1                                  |
| EGFR                                      | KRAS   | SMO     | PTEN                     | CSNK2A1         | PDGFRA  | FGFR2                                  |
| ERBB2                                     | MAGOH  | SPOP    | RB1                      | DCUN1D1         | PIK3CA  | FGFR3                                  |
| ERBB3                                     | MAP2K1 | SRC     | SMAD4                    | EGFR            | PNP     | NTRK3                                  |
| ERBB4                                     | MAP2K2 | STAT3   | SMARCB1                  | ERBB2           | PPARG   | PDGFRA                                 |
| ESR1                                      | MAPK1  | U2AF1   | STK11                    | FGFR1           | RPS6KB1 | PPARG                                  |
| EZH2                                      | MAX    | XPO1    | TET2                     | FGFR2           | SOX2    | RAF1                                   |
| FGFR1                                     | MED12  |         | TP53                     | FGFR3           | TERT    |                                        |
| FGFR2                                     | MET    |         | TSC1                     | FGFR4           | TIAF1   |                                        |
| FGFR3                                     | MLH1   |         | TSC2                     | FLT3            | ZNF217  |                                        |
| FLT3                                      | MPL    |         | VHL                      | GAS6            |         |                                        |
| FOXL2                                     | MTOR   |         | WT1                      |                 |         |                                        |

**Supplementary Table S2.** Predicting gene ontology biological process from mutation data. The mutation statuses carried out based on GO annotation and analysis. Enrichment of functionally related GO terms among the mutation gene and clustering of significant GO term was analyzed by CLC genomic workbench (full list).

| GO term     | Description                                                   | <i>p</i> -values |
|-------------|---------------------------------------------------------------|------------------|
| GO: 0007155 | cell adhesion                                                 | 1.53E-14         |
| GO: 0016477 | cell migration                                                | 8.63E-11         |
| GO: 0030198 | extracellular matrix organization                             | 1.01E-10         |
| GO: 0018108 | peptidyl-tyrosine phosphorylation                             | 1.21E-08         |
| GO: 0006468 | protein phosphorylation                                       | 2.38E-08         |
| GO: 0007411 | axon guidance                                                 | 3.83E-08         |
| GO: 0030036 | actin cytoskeleton organization                               | 3.99E-08         |
| GO: 0046777 | protein autophosphorylation                                   | 5.64E-08         |
| GO: 0007507 | heart development                                             | 6.76E-07         |
| GO: 0051056 | regulation of small GTPase mediated signal transduction       | 6.99E-07         |
| GO: 0048010 | vascular endothelial growth factor receptor signaling pathway | 7.79E-07         |
| GO: 2000463 | positive regulation of excitatory postsynaptic potential      | 2.34E-06         |
| GO: 0009968 | negative regulation of signal transduction                    | 2.69E-06         |
| GO: 0071300 | cellular response to retinoic acid                            | 4.30E-06         |
| GO: 0007165 | signal transduction                                           | 8.22E-06         |
| GO: 0043410 | positive regulation of MAPK cascade                           | 1.21E-05         |
| GO: 0007399 | nervous system development                                    | 1.34E-05         |
| GO: 0010595 | positive regulation of endothelial cell migration             | 1.76E-05         |
| GO: 0006024 | glycosaminoglycan biosynthetic process                        | 1.98E-05         |
| GO: 0060997 | dendritic spine morphogenesis                                 | 2.64E-05         |
| GO: 0048013 | ephrin receptor signaling pathway                             | 3.01E-05         |
| GO: 0018105 | peptidyl-serine phosphorylation                               | 4.74E-05         |
| GO: 0035556 | intracellular signal transduction                             | 5.43E-05         |
| GO: 0001954 | positive regulation of cell-matrix adhesion                   | 6.52E-05         |
| GO: 0048565 | digestive tract development                                   | 6.52E-05         |
| GO: 0043542 | endothelial cell migration                                    | 6.76E-05         |
| GO: 0033674 | positive regulation of kinase activity                        | 7.83E-05         |

|             |                                                                                                  |          |
|-------------|--------------------------------------------------------------------------------------------------|----------|
| GO: 0052696 | flavonoid glucuronidation                                                                        | 7.83E-05 |
| GO: 0090129 | positive regulation of synapse maturation                                                        | 7.83E-05 |
| GO: 0045165 | cell fate commitment                                                                             | 8.00E-05 |
| GO: 0001843 | neural tube closure                                                                              | 9.64E-05 |
| GO: 0042059 | negative regulation of epidermal growth factor receptor signaling pathway                        | 9.64E-05 |
| GO: 2000145 | regulation of cell motility                                                                      | 9.64E-05 |
| GO: 0038083 | peptidyl-tyrosine autophosphorylation                                                            | 1.12E-04 |
| GO: 0008285 | negative regulation of cell proliferation                                                        | 1.13E-04 |
| GO: 0007416 | synapse assembly                                                                                 | 1.17E-04 |
| GO: 0051968 | positive regulation of synaptic transmission, glutamatergic                                      | 1.18E-04 |
| GO: 0000165 | MAPK cascade                                                                                     | 1.20E-04 |
| GO: 0045893 | positive regulation of transcription, DNA-templated                                              | 1.30E-04 |
| GO: 0010976 | positive regulation of neuron projection development                                             | 1.51E-04 |
| GO: 0071526 | semaphorin-plexin signaling pathway                                                              | 1.56E-04 |
| GO: 0070374 | positive regulation of ERK1 and ERK2 cascade                                                     | 1.64E-04 |
| GO: 0070848 | response to growth factor                                                                        | 1.92E-04 |
| GO: 0007420 | brain development                                                                                | 2.19E-04 |
| GO: 0007158 | neuron cell-cell adhesion                                                                        | 2.39E-04 |
| GO: 0070102 | interleukin-6-mediated signaling pathway                                                         | 2.39E-04 |
| GO: 0007275 | multicellular organism development                                                               | 2.52E-04 |
| GO: 0043124 | negative regulation of I-kappaB kinase/NF-kappaB signaling                                       | 2.57E-04 |
| GO: 0007417 | central nervous system development                                                               | 2.67E-04 |
| GO: 0030534 | adult behavior                                                                                   | 2.82E-04 |
| GO: 0009887 | animal organ morphogenesis                                                                       | 2.88E-04 |
| GO: 0052697 | xenobiotic glucuronidation                                                                       | 3.08E-04 |
| GO: 0030335 | positive regulation of cell migration                                                            | 3.54E-04 |
| GO: 0006897 | endocytosis                                                                                      | 3.67E-04 |
| GO: 0030154 | cell differentiation                                                                             | 3.88E-04 |
| GO: 0072659 | protein localization to plasma membrane                                                          | 4.30E-04 |
| GO: 2000311 | regulation of alpha-amino-3-hydroxy-5-methyl-4-isoxazole propionate selective glutamate receptor | 4.60E-04 |

|             |                                                                             |          |
|-------------|-----------------------------------------------------------------------------|----------|
|             | activity                                                                    |          |
| GO: 0018107 | peptidyl-threonine phosphorylation                                          | 5.61E-04 |
| GO: 0003148 | outflow tract septum morphogenesis                                          | 5.92E-04 |
| GO: 0019933 | cAMP-mediated signaling                                                     | 5.92E-04 |
| GO: 0050808 | synapse organization                                                        | 5.92E-04 |
| GO: 0045669 | positive regulation of osteoblast differentiation                           | 6.38E-04 |
| GO: 0046328 | regulation of JNK cascade                                                   | 7.21E-04 |
| GO: 0032147 | activation of protein kinase activity                                       | 7.22E-04 |
| GO: 0061024 | membrane organization                                                       | 7.53E-04 |
| GO: 0042297 | vocal learning                                                              | 8.00E-04 |
| GO: 0043535 | regulation of blood vessel endothelial cell migration                       | 8.00E-04 |
| GO: 0051271 | negative regulation of cellular component movement                          | 8.00E-04 |
| GO: 0061298 | retina vasculature development in camera-type eye                           | 8.00E-04 |
| GO: 0007612 | learning                                                                    | 8.13E-04 |
| GO: 0007169 | transmembrane receptor protein tyrosine kinase signaling pathway            | 8.48E-04 |
| GO: 0003180 | aortic valve morphogenesis                                                  | 8.66E-04 |
| GO: 0071625 | vocalization behavior                                                       | 8.91E-04 |
| GO: 2000310 | regulation of N-methyl-D-aspartate selective glutamate receptor activity    | 8.91E-04 |
| GO: 0001934 | positive regulation of protein phosphorylation                              | 9.08E-04 |
| GO: 0007010 | cytoskeleton organization                                                   | 9.46E-04 |
| GO: 0045765 | regulation of angiogenesis                                                  | 1.00E-03 |
| GO: 0007229 | integrin-mediated signaling pathway                                         | 1.01E-03 |
| GO: 0010863 | positive regulation of phospholipase C activity                             | 1.04E-03 |
| GO: 0001764 | neuron migration                                                            | 1.05E-03 |
| GO: 0007157 | heterophilic cell-cell adhesion via plasma membrane cell adhesion molecules | 1.05E-03 |
| GO: 0045732 | positive regulation of protein catabolic process                            | 1.06E-03 |
| GO: 2000641 | regulation of early endosome to late endosome transport                     | 1.07E-03 |

|             |                                                                       |          |
|-------------|-----------------------------------------------------------------------|----------|
| GO: 0007173 | epidermal growth factor receptor signaling pathway                    | 1.08E-03 |
| GO: 0007179 | transforming growth factor beta receptor signaling pathway            | 1.09E-03 |
| GO: 0030032 | lamellipodium assembly                                                | 1.15E-03 |
| GO: 0030041 | actin filament polymerization                                         | 1.15E-03 |
| GO: 0045332 | phospholipid translocation                                            | 1.15E-03 |
| GO: 0006895 | Golgi to endosome transport                                           | 1.18E-03 |
| GO: 0045599 | negative regulation of fat cell differentiation                       | 1.27E-03 |
| GO: 0060070 | canonical Wnt signaling pathway                                       | 1.29E-03 |
| GO: 0000122 | negative regulation of transcription from RNA polymerase II promoter  | 1.43E-03 |
| GO: 0006811 | ion transport                                                         | 1.47E-03 |
| GO: 0090630 | activation of GTPase activity                                         | 1.47E-03 |
| GO: 0030168 | platelet activation                                                   | 1.49E-03 |
| GO: 0030336 | negative regulation of cell migration                                 | 1.58E-03 |
| GO: 0001568 | blood vessel development                                              | 1.62E-03 |
| GO: 1904646 | cellular response to beta-amyloid                                     | 1.62E-03 |
| GO: 0035176 | social behavior                                                       | 1.91E-03 |
| GO: 0045747 | positive regulation of Notch signaling pathway                        | 1.91E-03 |
| GO: 0045944 | positive regulation of transcription from RNA polymerase II promoter  | 1.93E-03 |
| GO: 0031623 | receptor internalization                                              | 2.00E-03 |
| GO: 0008284 | positive regulation of cell proliferation                             | 2.04E-03 |
| GO: 0050770 | regulation of axonogenesis                                            | 2.25E-03 |
| GO: 0006027 | glycosaminoglycan catabolic process                                   | 2.29E-03 |
| GO: 0007517 | muscle organ development                                              | 2.67E-03 |
| GO: 0014065 | phosphatidylinositol 3-kinase signaling                               | 2.70E-03 |
| GO: 0002053 | positive regulation of mesenchymal cell proliferation                 | 2.74E-03 |
| GO: 0045945 | positive regulation of transcription from RNA polymerase III promoter | 2.74E-03 |
| GO: 0045956 | positive regulation of calcium ion-dependent exocytosis               | 2.74E-03 |
| GO: 0048009 | insulin-like growth factor receptor signaling pathway                 | 2.74E-03 |
| GO: 0048705 | skeletal system morphogenesis                                         | 2.74E-03 |

|             |                                                                                              |          |
|-------------|----------------------------------------------------------------------------------------------|----------|
| GO: 1900273 | positive regulation of long-term synaptic potentiation                                       | 2.74E-03 |
| GO: 0098609 | cell-cell adhesion                                                                           | 3.08E-03 |
| GO: 0001736 | establishment of planar polarity                                                             | 3.33E-03 |
| GO: 0001945 | lymph vessel development                                                                     | 3.33E-03 |
| GO: 0009649 | entrainment of circadian clock                                                               | 3.33E-03 |
| GO: 0043583 | ear development                                                                              | 3.33E-03 |
| GO: 0045176 | apical protein localization                                                                  | 3.33E-03 |
| GO: 0046903 | secretion                                                                                    | 3.33E-03 |
| GO: 0051014 | actin filament severing                                                                      | 3.33E-03 |
| GO: 0060841 | venous blood vessel development                                                              | 3.33E-03 |
| GO: 0071681 | cellular response to indole-3-methanol                                                       | 3.33E-03 |
| GO: 0072207 | metanephric epithelium development                                                           | 3.33E-03 |
| GO: 0097107 | postsynaptic density assembly                                                                | 3.33E-03 |
| GO: 0097119 | postsynaptic density protein 95 clustering                                                   | 3.33E-03 |
| GO: 0097151 | positive regulation of inhibitory postsynaptic potential                                     | 3.33E-03 |
| GO: 0007156 | homophilic cell adhesion via plasma membrane adhesion molecules                              | 3.37E-03 |
| GO: 0030900 | forebrain development                                                                        | 3.40E-03 |
| GO: 0042058 | regulation of epidermal growth factor receptor signaling pathway                             | 3.40E-03 |
| GO: 0060261 | positive regulation of transcription initiation from RNA polymerase II promoter              | 3.40E-03 |
| GO: 1990000 | amyloid fibril formation                                                                     | 3.40E-03 |
| GO: 2000650 | negative regulation of sodium ion transmembrane transporter activity                         | 3.40E-03 |
| GO: 0007269 | neurotransmitter secretion                                                                   | 3.59E-03 |
| GO: 0051491 | positive regulation of filopodium assembly                                                   | 3.59E-03 |
| GO: 0001558 | regulation of cell growth                                                                    | 3.78E-03 |
| GO: 0007492 | endoderm development                                                                         | 3.84E-03 |
| GO: 0010763 | positive regulation of fibroblast migration                                                  | 3.84E-03 |
| GO: 0015014 | heparan sulfate proteoglycan biosynthetic process, polysaccharide chain biosynthetic process | 3.84E-03 |
| GO: 0032964 | collagen biosynthetic process                                                                | 3.84E-03 |
| GO: 0034244 | negative regulation of transcription elongation from RNA polymerase II                       | 3.84E-03 |

|             |                                                                                   |          |
|-------------|-----------------------------------------------------------------------------------|----------|
|             | promoter                                                                          |          |
| GO: 0035357 | peroxisome proliferator activated receptor signaling pathway                      | 3.84E-03 |
| GO: 0042692 | muscle cell differentiation                                                       | 3.84E-03 |
| GO: 0045792 | negative regulation of cell size                                                  | 3.84E-03 |
| GO: 1900181 | negative regulation of protein localization to nucleus                            | 3.84E-03 |
| GO: 1900748 | positive regulation of vascular endothelial growth factor signaling pathway       | 3.84E-03 |
| GO: 1901016 | regulation of potassium ion transmembrane transporter activity                    | 3.84E-03 |
| GO: 0007596 | blood coagulation                                                                 | 3.90E-03 |
| GO: 0009888 | tissue development                                                                | 3.97E-03 |
| GO: 0034329 | cell junction assembly                                                            | 3.97E-03 |
| GO: 0048814 | regulation of dendrite morphogenesis                                              | 3.97E-03 |
| GO: 0010718 | positive regulation of epithelial to mesenchymal transition                       | 4.07E-03 |
| GO: 0010975 | regulation of neuron projection development                                       | 4.33E-03 |
| GO: 0031581 | hemidesmosome assembly                                                            | 4.33E-03 |
| GO: 0051895 | negative regulation of focal adhesion assembly                                    | 4.33E-03 |
| GO: 0051965 | positive regulation of synapse assembly                                           | 5.10E-03 |
| GO: 0045668 | negative regulation of osteoblast differentiation                                 | 5.41E-03 |
| GO: 1900026 | positive regulation of substrate adhesion-dependent cell spreading                | 5.41E-03 |
| GO: 0007346 | regulation of mitotic cell cycle                                                  | 5.56E-03 |
| GO: 0001755 | neural crest cell migration                                                       | 5.60E-03 |
| GO: 0038128 | ERBB2 signaling pathway                                                           | 5.68E-03 |
| GO: 0060402 | calcium ion transport into cytosol                                                | 5.97E-03 |
| GO: 0090399 | replicative senescence                                                            | 5.97E-03 |
| GO: 0099133 | -                                                                                 | 5.97E-03 |
| GO: 0010628 | positive regulation of gene expression                                            | 6.23E-03 |
| GO: 0042127 | regulation of cell proliferation                                                  | 6.33E-03 |
| GO: 0030010 | establishment of cell polarity                                                    | 6.59E-03 |
| GO: 0030511 | positive regulation of transforming growth factor beta receptor signaling pathway | 6.59E-03 |
| GO: 0010629 | negative regulation of gene expression                                            | 6.63E-03 |



|             |                                                                                                                              |          |
|-------------|------------------------------------------------------------------------------------------------------------------------------|----------|
| GO: 0090090 | negative regulation of canonical Wnt signaling pathway                                                                       | 7.52E-03 |
| GO: 0048870 | cell motility                                                                                                                | 7.68E-03 |
| GO: 0007257 | activation of JUN kinase activity                                                                                            | 7.81E-03 |
| GO: 0050890 | cognition                                                                                                                    | 7.81E-03 |
| GO: 0071364 | cellular response to epidermal growth factor stimulus                                                                        | 7.91E-03 |
| GO: 0043087 | regulation of GTPase activity                                                                                                | 7.94E-03 |
| GO: 0022008 | neurogenesis                                                                                                                 | 7.94E-03 |
| GO: 0032148 | activation of protein kinase B activity                                                                                      | 7.98E-03 |
| GO: 0031573 | intra-S DNA damage checkpoint                                                                                                | 7.99E-03 |
| GO: 0048008 | platelet-derived growth factor receptor signaling pathway                                                                    | 7.99E-03 |
| GO: 0051924 | regulation of calcium ion transport                                                                                          | 7.99E-03 |
| GO: 2000249 | regulation of actin cytoskeleton reorganization                                                                              | 7.99E-03 |
| GO: 0001709 | cell fate determination                                                                                                      | 8.12E-03 |
| GO: 0003181 | atrioventricular valve morphogenesis                                                                                         | 8.12E-03 |
| GO: 0006970 | response to osmotic stress                                                                                                   | 8.12E-03 |
| GO: 0030203 | glycosaminoglycan metabolic process                                                                                          | 8.12E-03 |
| GO: 0032836 | glomerular basement membrane development                                                                                     | 8.12E-03 |
| GO: 0040014 | regulation of multicellular organism growth                                                                                  | 8.12E-03 |
| GO: 0043276 | anoikis                                                                                                                      | 8.12E-03 |
| GO: 0050768 | negative regulation of neurogenesis                                                                                          | 8.12E-03 |
| GO: 0050953 | sensory perception of light stimulus                                                                                         | 8.12E-03 |
| GO: 0030334 | regulation of cell migration                                                                                                 | 8.31E-03 |
| GO: 0023014 | signal transduction by protein phosphorylation                                                                               | 8.84E-03 |
| GO: 0007160 | cell-matrix adhesion                                                                                                         | 8.97E-03 |
| GO: 0008037 | cell recognition                                                                                                             | 9.43E-03 |
| GO: 0042472 | inner ear morphogenesis                                                                                                      | 9.43E-03 |
| GO: 0043433 | negative regulation of sequence-specific DNA binding transcription factor activity                                           | 0.01     |
| GO: 0002576 | platelet degranulation                                                                                                       | 0.01     |
| GO: 0002315 | marginal zone B cell differentiation                                                                                         | 0.01     |
| GO: 0031658 | negative regulation of cyclin-dependent protein serine/threonine kinase activity involved in G1/S transition of mitotic cell | 0.01     |

|             |                                                               |      |
|-------------|---------------------------------------------------------------|------|
|             | cycle                                                         |      |
| GO: 0035067 | negative regulation of histone acetylation                    | 0.01 |
| GO: 0035108 | limb morphogenesis                                            | 0.01 |
| GO: 0035148 | tube formation                                                | 0.01 |
| GO: 0035909 | aorta morphogenesis                                           | 0.01 |
| GO: 0036289 | peptidyl-serine autophosphorylation                           | 0.01 |
| GO: 0038202 | TORC1 signaling                                               | 0.01 |
| GO: 0048194 | Golgi vesicle budding                                         | 0.01 |
| GO: 0048384 | retinoic acid receptor signaling pathway                      | 0.01 |
| GO: 0048646 | anatomical structure formation involved in morphogenesis      | 0.01 |
| GO: 2000394 | positive regulation of lamellipodium morphogenesis            | 0.01 |
| GO: 2001234 | negative regulation of apoptotic signaling pathway            | 0.01 |
| GO: 0051496 | positive regulation of stress fiber assembly                  | 0.01 |
| GO: 0043491 | protein kinase B signaling                                    | 0.01 |
| GO: 0050731 | positive regulation of peptidyl-tyrosine phosphorylation      | 0.01 |
| GO: 0034383 | low-density lipoprotein particle clearance                    | 0.01 |
| GO: 0043552 | positive regulation of phosphatidylinositol 3-kinase activity | 0.01 |
| GO: 0007611 | learning or memory                                            | 0.01 |
| GO: 0006469 | negative regulation of protein kinase activity                | 0.01 |
| GO: 0019226 | transmission of nerve impulse                                 | 0.01 |
| GO: 0043277 | apoptotic cell clearance                                      | 0.01 |
| GO: 0048854 | brain morphogenesis                                           | 0.01 |
| GO: 0007267 | cell-cell signaling                                           | 0.01 |
| GO: 0032092 | positive regulation of protein binding                        | 0.01 |
| GO: 0031295 | T cell costimulation                                          | 0.01 |
| GO: 0010923 | negative regulation of phosphatase activity                   | 0.01 |
| GO: 0002159 | desmosome assembly                                            | 0.01 |
| GO: 0003197 | endocardial cushion development                               | 0.01 |
| GO: 0007270 | neuron-neuron synaptic transmission                           | 0.01 |
| GO: 0031915 | positive regulation of synaptic plasticity                    | 0.01 |
| GO: 0032410 | negative regulation of transporter activity                   | 0.01 |
| GO: 0035418 | protein localization to synapse                               | 0.01 |
| GO: 0042976 | activation of Janus kinase activity                           | 0.01 |

|             |                                                                               |      |
|-------------|-------------------------------------------------------------------------------|------|
| GO: 0048842 | positive regulation of axon extension<br>involved in axon guidance            | 0.01 |
| GO: 0051224 | negative regulation of protein transport                                      | 0.01 |
| GO: 0051552 | flavone metabolic process                                                     | 0.01 |
| GO: 0060390 | regulation of SMAD protein import into<br>nucleus                             | 0.01 |
| GO: 0060575 | intestinal epithelial cell differentiation                                    | 0.01 |
| GO: 0061180 | mammary gland epithelium development                                          | 0.01 |
| GO: 0070166 | enamel mineralization                                                         | 0.01 |
| GO: 0086045 | membrane depolarization during AV node<br>cell action potential               | 0.01 |
| GO: 0086046 | membrane depolarization during SA node<br>cell action potential               | 0.01 |
| GO: 1903243 | negative regulation of cardiac muscle<br>hypertrophy in response to stress    | 0.01 |
| GO: 1903363 | negative regulation of cellular protein<br>catabolic process                  | 0.01 |
| GO: 0043010 | camera-type eye development                                                   | 0.01 |
| GO: 0048268 | clathrin coat assembly                                                        | 0.01 |
| GO: 0002265 | astrocyte activation involved in immune<br>response                           | 0.01 |
| GO: 0003332 | negative regulation of extracellular matrix<br>constituent secretion          | 0.01 |
| GO: 0003416 | endochondral bone growth                                                      | 0.01 |
| GO: 0006740 | NADPH regeneration                                                            | 0.01 |
| GO: 0007617 | mating behavior                                                               | 0.01 |
| GO: 0010020 | chloroplast fission                                                           | 0.01 |
| GO: 0015697 | quaternary ammonium group transport                                           | 0.01 |
| GO: 0016185 | synaptic vesicle budding from presynaptic<br>endocytic zone membrane          | 0.01 |
| GO: 0033292 | T-tubule organization                                                         | 0.01 |
| GO: 0033600 | negative regulation of mammary gland<br>epithelial cell proliferation         | 0.01 |
| GO: 0033688 | regulation of osteoblast proliferation                                        | 0.01 |
| GO: 0035408 | histone H3-T6 phosphorylation                                                 | 0.01 |
| GO: 0035481 | positive regulation of Notch signaling<br>pathway involved in heart induction | 0.01 |
| GO: 0038189 | neuropilin signaling pathway                                                  | 0.01 |

|             |                                                                                    |      |
|-------------|------------------------------------------------------------------------------------|------|
| GO: 0042278 | purine nucleoside metabolic process                                                | 0.01 |
| GO: 0043585 | nose morphogenesis                                                                 | 0.01 |
| GO: 0048671 | negative regulation of collateral sprouting                                        | 0.01 |
| GO: 0048853 | forebrain morphogenesis                                                            | 0.01 |
| GO: 0051693 | actin filament capping                                                             | 0.01 |
| GO: 0051705 | multi-organism behavior                                                            | 0.01 |
| GO: 0060074 | synapse maturation                                                                 | 0.01 |
| GO: 0060219 | camera-type eye photoreceptor cell differentiation                                 | 0.01 |
| GO: 0060312 | regulation of blood vessel remodeling                                              | 0.01 |
| GO: 0070141 | response to UV-A                                                                   | 0.01 |
| GO: 0086048 | membrane depolarization during bundle of His cell action potential                 | 0.01 |
| GO: 0090292 | nuclear matrix anchoring at nuclear membrane                                       | 0.01 |
| GO: 0097116 | gephyrin clustering involved in postsynaptic density assembly                      | 0.01 |
| GO: 1900126 | negative regulation of hyaluronan biosynthetic process                             | 0.01 |
| GO: 1902254 | negative regulation of intrinsic apoptotic signaling pathway by p53 class mediator | 0.01 |
| GO: 1902339 | positive regulation of apoptotic process involved in morphogenesis                 | 0.01 |
| GO: 1902474 | positive regulation of protein localization to synapse                             | 0.01 |
| GO: 2000707 | positive regulation of dense core granule biogenesis                               | 0.01 |
| GO: 2001222 | regulation of neuron migration                                                     | 0.01 |
| GO: 0001889 | liver development                                                                  | 0.01 |
| GO: 0045104 | intermediate filament cytoskeleton organization                                    | 0.01 |
| GO: 0070509 | calcium ion import                                                                 | 0.01 |
| GO: 0072583 | clathrin-dependent endocytosis                                                     | 0.01 |
| GO: 2000251 | positive regulation of actin cytoskeleton reorganization                           | 0.01 |
| GO: 0007613 | memory                                                                             | 0.02 |
| GO: 0034446 | substrate adhesion-dependent cell spreading                                        | 0.02 |
| GO: 0050679 | positive regulation of epithelial cell                                             | 0.02 |

|             |                                                                                                                    |      |
|-------------|--------------------------------------------------------------------------------------------------------------------|------|
|             | proliferation                                                                                                      |      |
| GO: 0043547 | positive regulation of GTPase activity                                                                             | 0.02 |
| GO: 0034220 | ion transmembrane transport                                                                                        | 0.02 |
| GO: 0030324 | lung development                                                                                                   | 0.02 |
| GO: 0043066 | negative regulation of apoptotic process                                                                           | 0.02 |
| GO: 0035987 | endodermal cell differentiation                                                                                    | 0.02 |
| GO: 0050919 | negative chemotaxis                                                                                                | 0.02 |
| GO: 0006909 | phagocytosis                                                                                                       | 0.02 |
| GO: 0070372 | regulation of ERK1 and ERK2 cascade                                                                                | 0.02 |
| GO: 1900740 | positive regulation of protein insertion into<br>mitochondrial membrane involved in<br>apoptotic signaling pathway | 0.02 |
| GO: 0010812 | negative regulation of cell-substrate adhesion                                                                     | 0.02 |
| GO: 0030878 | thyroid gland development                                                                                          | 0.02 |
| GO: 0032801 | receptor catabolic process                                                                                         | 0.02 |
| GO: 0048706 | embryonic skeletal system development                                                                              | 0.02 |
| GO: 0090286 | cytoskeletal anchoring at nuclear membrane                                                                         | 0.02 |
| GO: 1902287 | semaphorin-plexin signaling pathway<br>involved in axon guidance                                                   | 0.02 |
| GO: 0043647 | inositol phosphate metabolic process                                                                               | 0.02 |
| GO: 0010468 | regulation of gene expression                                                                                      | 0.02 |
| GO: 0048468 | cell development                                                                                                   | 0.02 |
| GO: 0042493 | response to drug                                                                                                   | 0.02 |
| GO: 0016310 | phosphorylation                                                                                                    | 0.02 |
| GO: 0048015 | phosphatidylinositol-mediated signaling                                                                            | 0.02 |
| GO: 0051453 | regulation of intracellular pH                                                                                     | 0.02 |
| GO: 0007215 | glutamate receptor signaling pathway                                                                               | 0.02 |
| GO: 0035723 | interleukin-15-mediated signaling pathway                                                                          | 0.02 |
| GO: 0045216 | cell-cell junction organization                                                                                    | 0.02 |
| GO: 0046475 | glycerophospholipid catabolic process                                                                              | 0.02 |
| GO: 0050775 | positive regulation of dendrite<br>morphogenesis                                                                   | 0.02 |
| GO: 0071902 | positive regulation of protein serine/threonine<br>kinase activity                                                 | 0.02 |
| GO: 0032793 | positive regulation of CREB transcription<br>factor activity                                                       | 0.02 |
| GO: 0045055 | regulated exocytosis                                                                                               | 0.02 |
| GO: 0051899 | membrane depolarization                                                                                            | 0.02 |

|             |                                                                                 |      |
|-------------|---------------------------------------------------------------------------------|------|
| GO: 0060349 | bone morphogenesis                                                              | 0.02 |
| GO: 0048661 | positive regulation of smooth muscle cell proliferation                         | 0.02 |
| GO: 0060412 | ventricular septum morphogenesis                                                | 0.02 |
| GO: 0033138 | positive regulation of peptidyl-serine phosphorylation                          | 0.02 |
| GO: 0035584 | calcium-mediated signaling using intracellular calcium source                   | 0.02 |
| GO: 0048147 | negative regulation of fibroblast proliferation                                 | 0.02 |
| GO: 0097009 | energy homeostasis                                                              | 0.02 |
| GO: 0007389 | pattern specification process                                                   | 0.02 |
| GO: 0030111 | regulation of Wnt signaling pathway                                             | 0.02 |
| GO: 0060291 | long-term synaptic potentiation                                                 | 0.02 |
| GO: 0070555 | response to interleukin-1                                                       | 0.02 |
| GO: 0001944 | vasculature development                                                         | 0.02 |
| GO: 0010614 | negative regulation of cardiac muscle hypertrophy                               | 0.02 |
| GO: 0010742 | macrophage derived foam cell differentiation                                    | 0.02 |
| GO: 0015879 | carnitine transport                                                             | 0.02 |
| GO: 0032688 | negative regulation of interferon-beta production                               | 0.02 |
| GO: 0035235 | ionotropic glutamate receptor signaling pathway                                 | 0.02 |
| GO: 0043297 | apical junction assembly                                                        | 0.02 |
| GO: 0048806 | genitalia development                                                           | 0.02 |
| GO: 0048846 | axon extension involved in axon guidance                                        | 0.02 |
| GO: 0051639 | actin filament network formation                                                | 0.02 |
| GO: 0070544 | histone H3-K36 demethylation                                                    | 0.02 |
| GO: 0071872 | cellular response to epinephrine stimulus                                       | 0.02 |
| GO: 0086036 | regulation of cardiac muscle cell membrane potential                            | 0.02 |
| GO: 0098943 | neurotransmitter receptor transport, postsynaptic endosome to lysosome          | 0.02 |
| GO: 0098970 | postsynaptic neurotransmitter receptor diffusion trapping                       | 0.02 |
| GO: 1903800 | positive regulation of production of miRNAs involved in gene silencing by miRNA | 0.02 |
| GO: 2001056 | positive regulation of cysteine-type                                            | 0.02 |

|             |                                                                       |      |
|-------------|-----------------------------------------------------------------------|------|
|             | endopeptidase activity                                                |      |
| GO: 0051897 | positive regulation of protein kinase B signaling                     | 0.02 |
| GO: 0032088 | negative regulation of NF-kappaB transcription factor activity        | 0.02 |
| GO: 0007043 | cell-cell junction assembly                                           | 0.02 |
| GO: 0070527 | platelet aggregation                                                  | 0.03 |
| GO: 0030100 | regulation of endocytosis                                             | 0.03 |
| GO: 0035329 | hippo signaling                                                       | 0.03 |
| GO: 0006357 | regulation of transcription from RNA polymerase II promoter           | 0.03 |
| GO: 0001946 | lymphangiogenesis                                                     | 0.03 |
| GO: 0038110 | interleukin-2-mediated signaling pathway                              | 0.03 |
| GO: 0045056 | transcytosis                                                          | 0.03 |
| GO: 0050806 | positive regulation of synaptic transmission                          | 0.03 |
| GO: 0060391 | positive regulation of SMAD protein import into nucleus               | 0.03 |
| GO: 0071404 | cellular response to low-density lipoprotein particle stimulus        | 0.03 |
| GO: 0097028 | dendritic cell differentiation                                        | 0.03 |
| GO: 0097105 | presynaptic membrane assembly                                         | 0.03 |
| GO: 0097435 | fibril organization                                                   | 0.03 |
| GO: 2000573 | positive regulation of DNA biosynthetic process                       | 0.03 |
| GO: 2001020 | regulation of response to DNA damage stimulus                         | 0.03 |
| GO: 0030178 | negative regulation of Wnt signaling pathway                          | 0.03 |
| GO: 0007213 | G-protein coupled acetylcholine receptor signaling pathway            | 0.03 |
| GO: 0010592 | positive regulation of lamellipodium assembly                         | 0.03 |
| GO: 0010842 | retina layer formation                                                | 0.03 |
| GO: 0021766 | hippocampus development                                               | 0.03 |
| GO: 0035082 | axoneme assembly                                                      | 0.03 |
| GO: 0045197 | establishment or maintenance of epithelial cell apical/basal polarity | 0.03 |
| GO: 0046847 | filopodium assembly                                                   | 0.03 |
| GO: 0070050 | neuron cellular homeostasis                                           | 0.03 |

|             |                                                                           |      |
|-------------|---------------------------------------------------------------------------|------|
| GO: 0070886 | positive regulation of calcineurin-NFAT signaling cascade                 | 0.03 |
| GO: 0016055 | Wnt signaling pathway                                                     | 0.03 |
| GO: 0060828 | regulation of canonical Wnt signaling pathway                             | 0.03 |
| GO: 0007162 | negative regulation of cell adhesion                                      | 0.03 |
| GO: 0010971 | positive regulation of G2/M transition of mitotic cell cycle              | 0.03 |
| GO: 0048843 | negative regulation of axon extension involved in axon guidance           | 0.03 |
| GO: 0001658 | branching involved in ureteric bud morphogenesis                          | 0.03 |
| GO: 0007221 | positive regulation of transcription of Notch receptor target             | 0.03 |
| GO: 0010613 | positive regulation of cardiac muscle hypertrophy                         | 0.03 |
| GO: 0016601 | Rac protein signal transduction                                           | 0.03 |
| GO: 0035249 | synaptic transmission, glutamatergic                                      | 0.03 |
| GO: 0045742 | positive regulation of epidermal growth factor receptor signaling pathway | 0.03 |
| GO: 0051402 | neuron apoptotic process                                                  | 0.03 |
| GO: 0051894 | positive regulation of focal adhesion assembly                            | 0.03 |
| GO: 0071377 | cellular response to glucagon stimulus                                    | 0.03 |
| GO: 1901379 | regulation of potassium ion transmembrane transport                       | 0.03 |
| GO: 0007172 | signal complex assembly                                                   | 0.03 |
| GO: 0007603 | phototransduction, visible light                                          | 0.03 |
| GO: 0009804 | coumarin metabolic process                                                | 0.03 |
| GO: 0018027 | peptidyl-lysine dimethylation                                             | 0.03 |
| GO: 0031290 | retinal ganglion cell axon guidance                                       | 0.03 |
| GO: 0031666 | positive regulation of lipopolysaccharide-mediated signaling pathway      | 0.03 |
| GO: 0032873 | negative regulation of stress-activated MAPK cascade                      | 0.03 |
| GO: 0033160 | positive regulation of protein import into nucleus, translocation         | 0.03 |



|             |                                                                                 |      |
|-------------|---------------------------------------------------------------------------------|------|
| GO: 0035313 | wound healing, spreading of epidermal cells                                     | 0.03 |
| GO: 0035542 | regulation of SNARE complex assembly                                            | 0.03 |
| GO: 0035729 | cellular response to hepatocyte growth factor stimulus                          | 0.03 |
| GO: 0035773 | insulin secretion involved in cellular response to glucose stimulus             | 0.03 |
| GO: 0038063 | collagen-activated tyrosine kinase receptor signaling pathway                   | 0.03 |
| GO: 0042421 | norepinephrine biosynthetic process                                             | 0.03 |
| GO: 0042426 | choline catabolic process                                                       | 0.03 |
| GO: 0045124 | regulation of bone resorption                                                   | 0.03 |
| GO: 0045779 | negative regulation of bone resorption                                          | 0.03 |
| GO: 0046488 | phosphatidylinositol metabolic process                                          | 0.03 |
| GO: 0046621 | negative regulation of organ growth                                             | 0.03 |
| GO: 0050872 | white fat cell differentiation                                                  | 0.03 |
| GO: 0051764 | actin crosslink formation                                                       | 0.03 |
| GO: 0060339 | negative regulation of type I interferon-mediated signaling pathway             | 0.03 |
| GO: 0061072 | iris morphogenesis                                                              | 0.03 |
| GO: 0071875 | adrenergic receptor signaling pathway                                           | 0.03 |
| GO: 0097484 | dendrite extension                                                              | 0.03 |
| GO: 1903799 | negative regulation of production of miRNAs involved in gene silencing by miRNA | 0.03 |
| GO: 1990869 | cellular response to chemokine                                                  | 0.03 |
| GO: 0008360 | regulation of cell shape                                                        | 0.03 |
| GO: 0007265 | Ras protein signal transduction                                                 | 0.03 |
| GO: 0006813 | potassium ion transport                                                         | 0.03 |
| GO: 0007188 | adenylate cyclase-modulating G-protein coupled receptor signaling pathway       | 0.03 |
| GO: 0016485 | protein processing                                                              | 0.03 |
| GO: 0045766 | positive regulation of angiogenesis                                             | 0.03 |
| GO: 0043065 | positive regulation of apoptotic process                                        | 0.03 |
| GO: 0006865 | amino acid transport                                                            | 0.04 |
| GO: 0032956 | regulation of actin cytoskeleton organization                                   | 0.04 |
| GO: 0030182 | neuron differentiation                                                          | 0.04 |
| GO: 0000902 | cell morphogenesis                                                              | 0.04 |
| GO: 0007409 | axonogenesis                                                                    | 0.04 |
| GO: 0007266 | Rho protein signal transduction                                                 | 0.04 |

|             |                                                                 |      |
|-------------|-----------------------------------------------------------------|------|
| GO: 0007040 | lysosome organization                                           | 0.04 |
| GO: 0045595 | regulation of cell differentiation                              | 0.04 |
| GO: 0048791 | calcium ion-regulated exocytosis of neurotransmitter            | 0.04 |
| GO: 0006623 | protein targeting to vacuole                                    | 0.04 |
| GO: 0007016 | cytoskeletal anchoring at plasma membrane                       | 0.04 |
| GO: 0007220 | Notch receptor processing                                       | 0.04 |
| GO: 0015695 | organic cation transport                                        | 0.04 |
| GO: 0042592 | homeostatic process                                             | 0.04 |
| GO: 0045651 | positive regulation of macrophage differentiation               | 0.04 |
| GO: 0045657 | positive regulation of monocyte differentiation                 | 0.04 |
| GO: 0048557 | embryonic digestive tract morphogenesis                         | 0.04 |
| GO: 0048699 | generation of neurons                                           | 0.04 |
| GO: 0050732 | negative regulation of peptidyl-tyrosine phosphorylation        | 0.04 |
| GO: 0051918 | negative regulation of fibrinolysis                             | 0.04 |
| GO: 0071233 | cellular response to leucine                                    | 0.04 |
| GO: 0071425 | hematopoietic stem cell proliferation                           | 0.04 |
| GO: 0071901 | negative regulation of protein serine/threonine kinase activity | 0.04 |
| GO: 0090150 | establishment of protein localization to membrane               | 0.04 |
| GO: 0099054 | presynapse assembly                                             | 0.04 |
| GO: 0008333 | endosome to lysosome transport                                  | 0.04 |
| GO: 0070317 | negative regulation of G0 to G1 transition                      | 0.04 |
| GO: 0086091 | regulation of heart rate by cardiac conduction                  | 0.04 |
| GO: 0034394 | protein localization to cell surface                            | 0.04 |
| GO: 0042177 | negative regulation of protein catabolic process                | 0.04 |
| GO: 0001938 | positive regulation of endothelial cell proliferation           | 0.04 |
| GO: 0031032 | actomyosin structure organization                               | 0.04 |
| GO: 0050772 | positive regulation of axonogenesis                             | 0.04 |
| GO: 0000710 | meiotic mismatch repair                                         | 0.05 |

---

**Supplementary Table S3.** Validation of mutation through Sanger sequencing.

| Sample ID# | Position       | Reference sequence | Genotype |
|------------|----------------|--------------------|----------|
| 1          | Chr9: 98211572 | T                  | T/A      |
| 2          | Chr9: 98211572 | T                  | T/A      |
| 3          | Chr9: 98211572 | T                  | T/A      |
| 4          | Chr9: 98211572 | T                  | A/A      |
| 5          | Chr9: 98211572 | T                  | T/A      |
| 6          | Chr9: 98211572 | T                  | T/A      |

**Supplementary Table S4.** Univariate analysis of hazard ratio according to sites of *PTCHI* mutations in patients with breast cancer (n = 44).

|                                    | Hazard ratio | 95% Confidence interval | <i>p</i> -value |
|------------------------------------|--------------|-------------------------|-----------------|
| Exon 1                             | 1.875        | 0.760-4.623             | 0.172           |
| Exon 3                             | 1.265        | 0.170-9.425             | 0.819           |
| Exon 6                             | 1.605        | 0.215-11.980            | 0.645           |
| Exon 7                             | 0.763        | 0.178-3.273             | 0.716           |
| Exon 8                             | 2.185        | 0.289-16.496            | 0.448           |
| Exon 10                            | 0.047        | 0-2220.028              | 0.578           |
| Exon 12                            | 0.047        | 0-2220.028              | 0.578           |
| Exon 14                            | 2.374        | 0.313-17.989            | 0.403           |
| Exon 15                            | 0.984        | 0.230-4.215             | 0.983           |
| Exon 17                            | 1.130        | 0.264-4.845             | 0.869           |
| Exon 19                            | 1.605        | 0.215-11.980            | 0.645           |
| Exon 20                            | 2.374        | 0.313-17.989            | 0.403           |
| Exon 21                            | 0.748        | 0.100-5.574             | 0.777           |
| Exon 22                            | 1.504        | 0.554-4.083             | 0.423           |
| Exon 23                            | 3.112        | 1.138-8.512             | 0.027*          |
| Exon 22 + 23                       | 2.496        | 1.063-5.861             | 0.036*          |
| c.3583A>T                          | 1.879        | 0.635-5.567             | 0.255           |
| All sites of <i>PTCHI</i> mutation | 2.491        | 1.062-5.843             | 0.036*          |

\**p*-value less than 0.05.

**Supplementary Table S5.** List of PTCH1 mutation in patients with lung, liver, or distant lymph node metastasis.

| Mutation site | Exon | Lung metastasis<br>(n = 16) | Liver metastasis<br>(n = 10) | Distant lymph node<br>metastasis (n = 13) |
|---------------|------|-----------------------------|------------------------------|-------------------------------------------|
| c.154C>T      | 1    | 3 (19%)                     | 3 (30%)                      | 3 (23%)                                   |
| c.158C>T      | 1    | 4 (25%)                     | 3 (30%)                      | 4 (31%)                                   |
| c.404G>A      | 3    | 0                           | 0                            | 0                                         |
| c.442G>A      | 3    | 0                           | 0                            | 0                                         |
| c.466C>T      | 3    | 0                           | 0                            | 0                                         |
| c.538G>A      | 3    | 1 (6%)                      | 1 (10%)                      | 1 (8%)                                    |
| c.823G>A      | 6    | 1 (6%)                      | 0                            | 1 (8%)                                    |
| c.946C>T      | 7    | 0                           | 0                            | 0                                         |
| c.949C>T      | 7    | 0                           | 0                            | 0                                         |
| c.957G>A      | 7    | 1 (6%)                      | 0                            | 1 (8%)                                    |
| c.958G>A      | 7    | 0                           | 0                            | 0                                         |
| c.973G>A      | 7    | 0                           | 0                            | 0                                         |
| c.1018G>A     | 7    | 0                           | 0                            | 0                                         |
| c.1180G>A     | 8    | 1 (6%)                      | 0                            | 1 (8%)                                    |
| c.1451G>A     | 10   | 0                           | 0                            | 0                                         |
| c.1696C>T     | 12   | 0                           | 0                            | 0                                         |
| c.2222C>T     | 14   | 1 (6%)                      | 0                            | 1 (8%)                                    |
| c.2251G>A     | 15   | 0                           | 0                            | 0                                         |
| c.2335G>A     | 15   | 1 (6%)                      | 1 (10%)                      | 1 (8%)                                    |
| c.2344C>T     | 15   | 0                           | 0                            | 0                                         |
| c.2357G>A     | 15   | 0                           | 0                            | 0                                         |
| c.2362T>G     | 15   | 0                           | 0                            | 0                                         |
| c.2422C>T     | 15   | 0                           | 0                            | 0                                         |
| c.2554C>T     | 15   | 0                           | 0                            | 0                                         |
| c.2723G>C     | 17   | 1 (6%)                      | 0                            | 1 (8%)                                    |
| c.2797G>A     | 17   | 1 (6%)                      | 0                            | 1 (8%)                                    |
| c.2872G>A     | 17   | 0                           | 0                            | 0                                         |
| c.3278G>A     | 19   | 1 (6%)                      | 0                            | 1 (8%)                                    |
| c.3430G>A     | 20   | 1 (6%)                      | 0                            | 1 (8%)                                    |
| c.3538C>T     | 21   | 1 (6%)                      | 0                            | 1 (8%)                                    |
| c.3583A>T     | 22   | 4 (25%)                     | 2 (20%)                      | 3 (23%)                                   |
| c.3610G>A     | 22   | 0                           | 0                            | 0                                         |
| c.3641C>T     | 22   | 1 (6%)                      | 1 (10%)                      | 1 (8%)                                    |

|           |    |        |         |        |
|-----------|----|--------|---------|--------|
| c.3832C>T | 23 | 1 (6%) | 0       | 1 (8%) |
| c.3835C>T | 23 | 1 (6%) | 1 (10%) | 1 (8%) |
| c.3844C>T | 23 | 0      | 0       | 0      |
| c.3907C>T | 23 | 1 (6%) | 1 (10%) | 0      |
| c.3941C>T | 23 | 1 (6%) | 1 (10%) | 0      |
| c.3992C>T | 23 | 0      | 0       | 0      |

---

**Supplementary Fig. S1.** Mutation prevalence in NCKUH and TCGA. The X-axis is the total number of mutations in the particular gene. The percentage close to the bar is the number of mutations in the particular gene divided by sum of all mutations in these 15 genes.

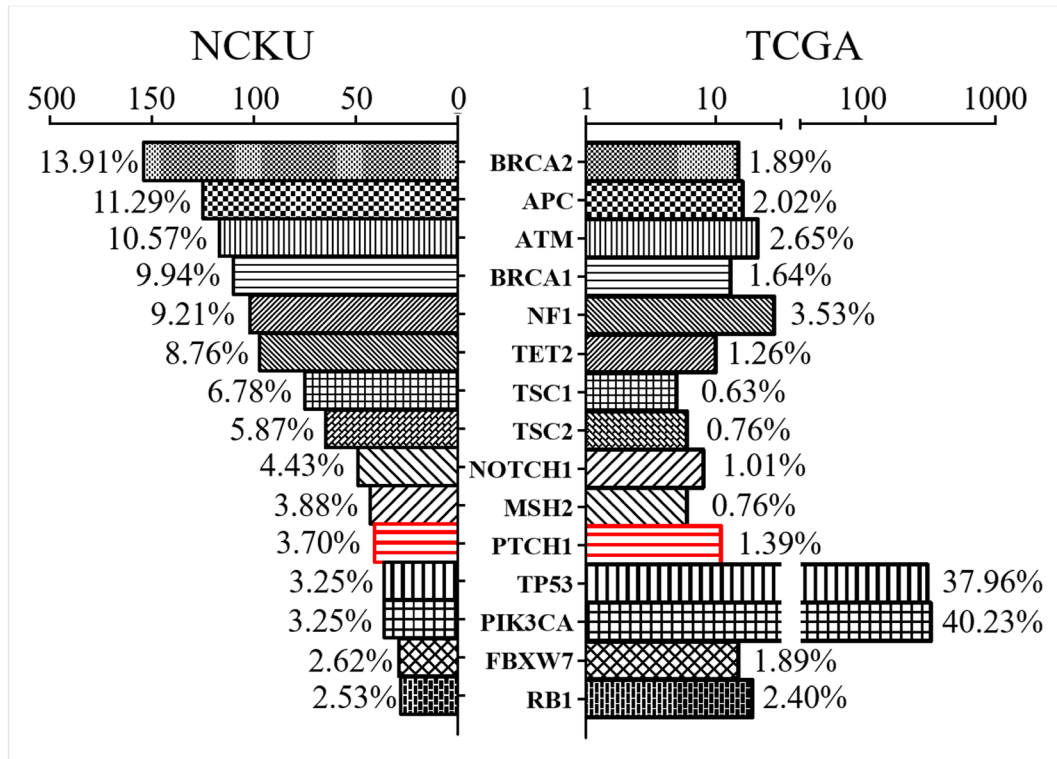

**Supplementary Fig. S2.** Mutational frequency of *PTCHI* gene in 44 patients with breast cancer. Total 6 patients had c.3583A>T mutation and the mutational frequency was consistently detectable.

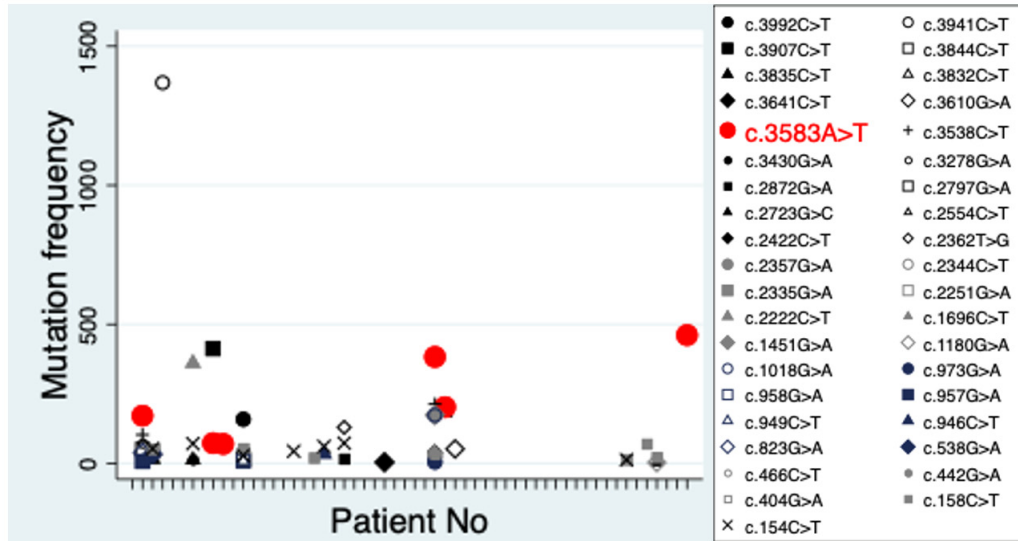



**Supplementary Fig. S3.** Predicted structure of wild-type *PTCH1* (left) and mutated *PTCH1* (right) by CLC genomic workbench.

PTCH1 – WT

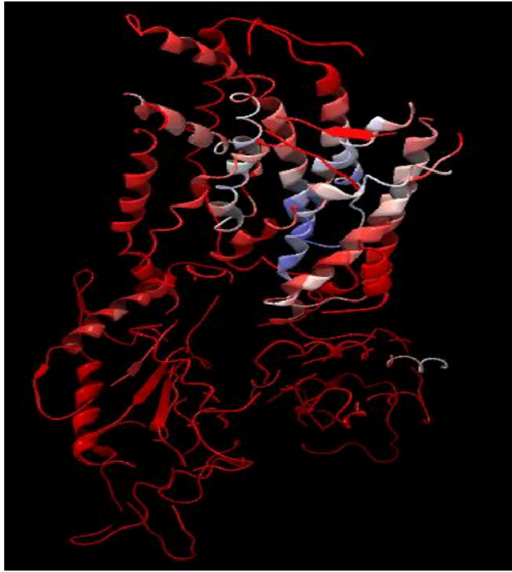

PTCH1- mutation

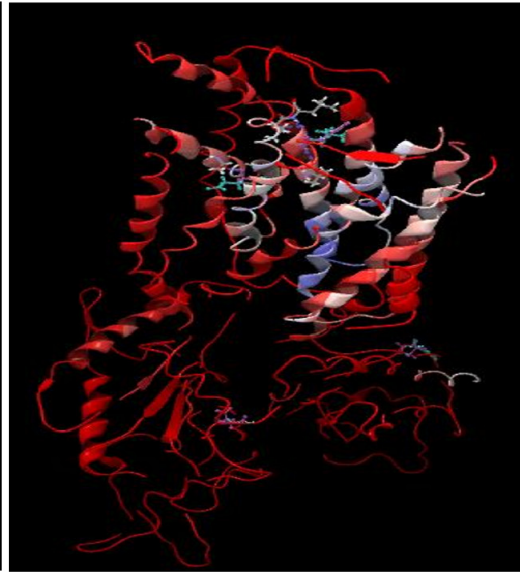

**Supplementary Fig. S4. A. to O.** Kaplan-Meier analysis of recurrence-free survival of mutations at different *PTCH1* domains according to different exon. **O.** The patients with mutated exon 23 of *PTCH1* had worse survival.

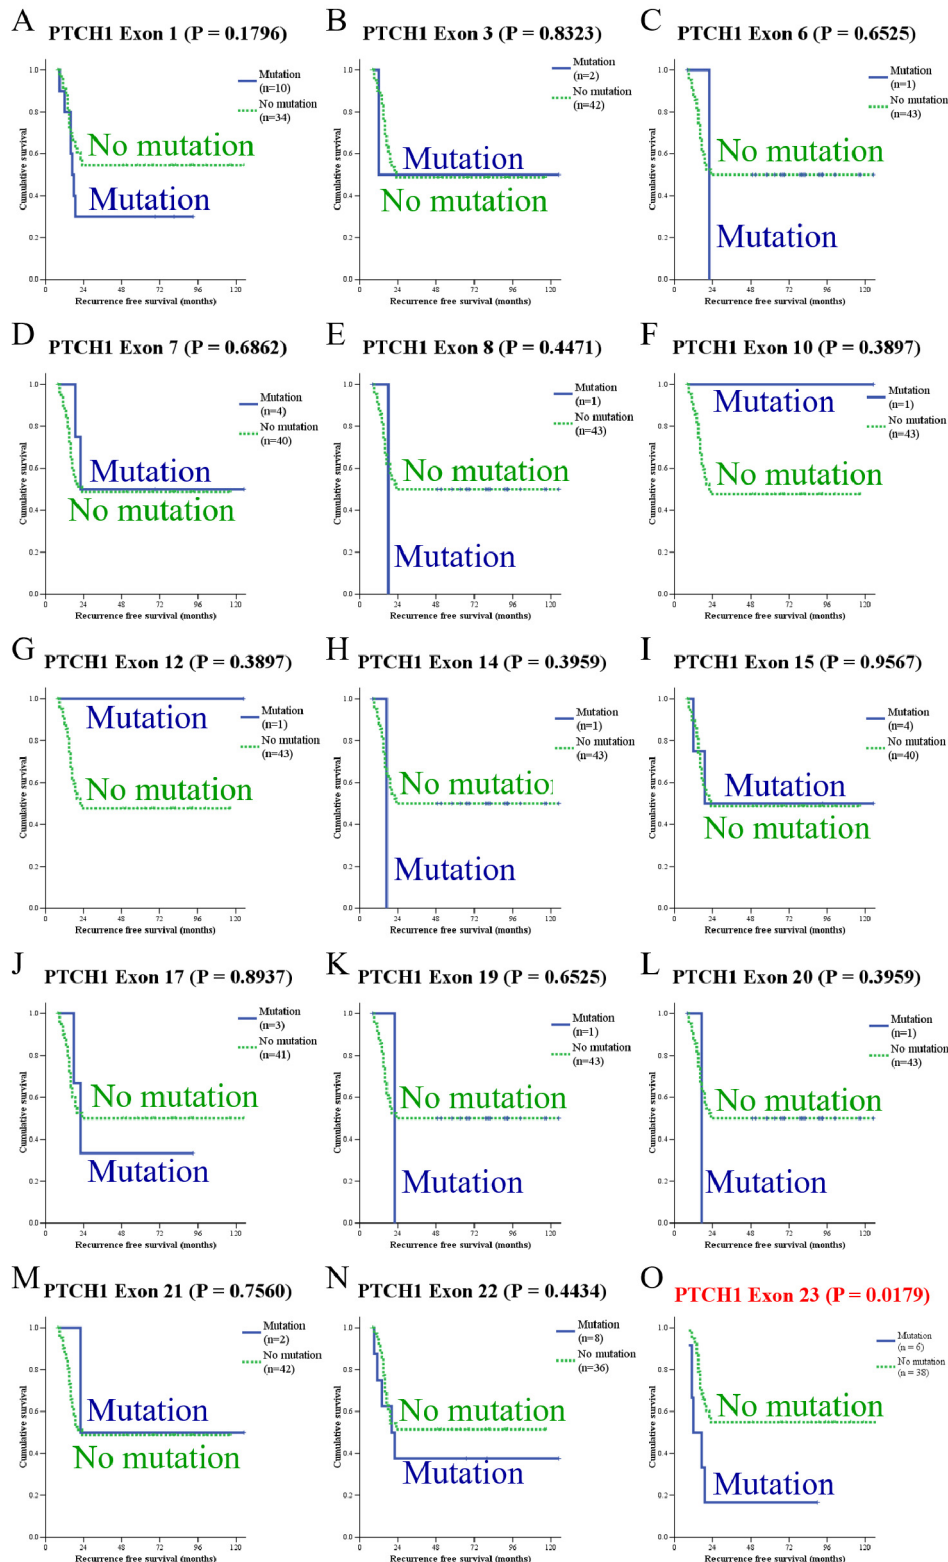

Supplement: 41598_2019_52617_MOESM1_ESM.pdf [file 41598_2019_52617_MOESM1_ESM.pdf]
